# Supplementary material for: Age-Correlated Gene Expression in Normal and Neurodegenerative Human Brain Tissues
Source: PLOS journal article supplement (doi:10.1371/journal.pone.0013098), 2010-09-29

**Figure S1.** Comparison between actual and predicted ages of controls and AD patients using reference data set D1.

We compared observed and predicted ages for controls and AD patients. While the difference between observed and predicted age was not significant for controls, AD patient samples had a significantly older predicted age compared to the actual observed age. (Top) Numbers of subjects, medians of ages, and P-values for Wilcoxon test are shown. (Bottom) Box and whiskers plots of observed and predicted ages for controls and AD patients. Box represents median (bar) and interquartile range, while whiskers represent range of all values excepting outliers (shown as open circles). Reference data set used for training our age predictor was D1 (BA10), and genes used for age prediction were selected using a nominal p-value cut-off of 0.005.

|                                                                    | Ctrl  | AD                                      |
|--------------------------------------------------------------------|-------|-----------------------------------------|
| Number of subjects                                                 | 11    | 23                                      |
| Median of actual age                                               | 79    | 79                                      |
| Median of predicted age                                            | 91.15 | 99.80                                   |
| Difference between medians                                         | 12.15 | 20.80                                   |
| Paired Wilcoxon test significance<br>(actual versus predicted age) | 0.24  | <b><math>2.38 \times 10^{-7}</math></b> |

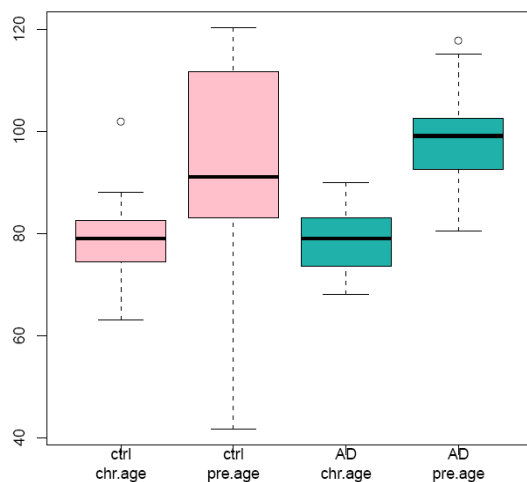

Supplement: S1 (10.1371/journal.pone.0013098.s001) [file journal.pone.0013098.s001]
